# Supplementary material
Source: Research Square preprint supplement (doi:10.21203/rs.3.rs-8406754/v1)
Supplement: Supplementary file [file 049930ef03e40e7f1714c16c.pdf]

## Appendix A Measurement Images

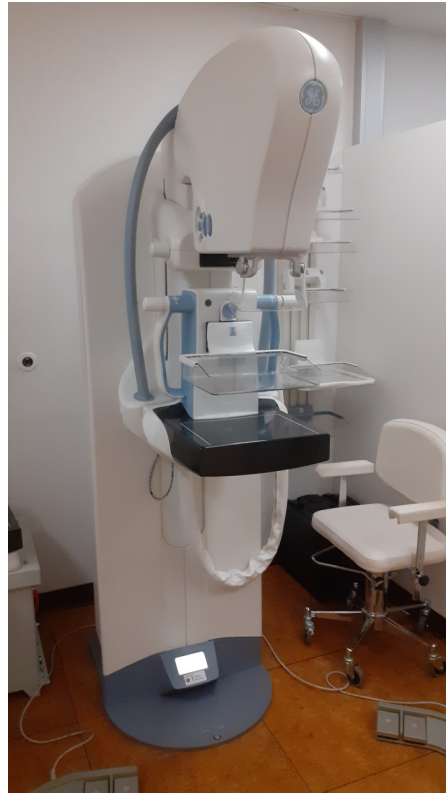

**Fig. A1** The mammography unit used in this work (Senographe Essential, GE Healthcare, DE).

001  
002  
003  
004  
005  
006  
007  
008  
009  
010  
011  
012  
013  
014  
015  
016  
017  
018  
019  
020  
021  
022  
023  
024  
025  
026  
027  
028  
029  
030  
031  
032  
033  
034  
035  
036  
037  
038  
039  
040  
041  
042  
043  
044  
045  
046

047  
048  
049  
050  
051  
052  
053  
054  
055  
056  
057  
058  
059  
060  
061  
062  
063  
064  
065  
066  
067  
068  
069  
070  
071  
072  
073  
074  
075  
076  
077  
078  
079  
080  
081  
082  
083  
084  
085  
086  
087  
088  
089  
090  
091  
092

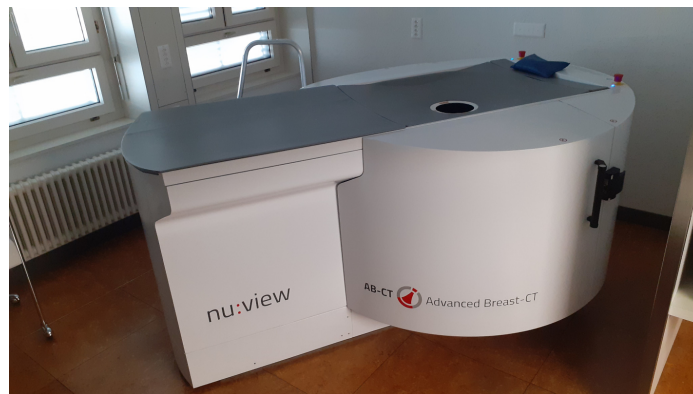

**Fig. A2** The breast CT unit used in this work (nu:view, Advanced Breast CT).

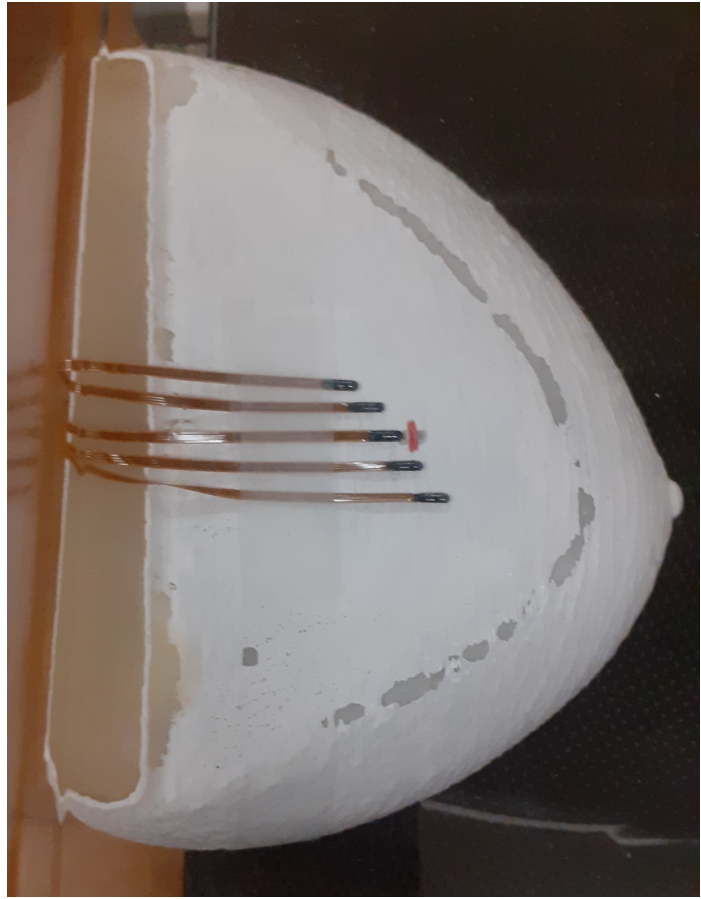

**Fig. A3** Close up image of the filled compressed phantom with dosimeter placement.

093  
094  
095  
096  
097  
098  
099  
100  
101  
102  
103  
104  
105  
106  
107  
108  
109  
110  
111  
112  
113  
114  
115  
116  
117  
118  
119  
120  
121  
122  
123  
124  
125  
126  
127  
128  
129  
130  
131  
132  
133  
134  
135  
136  
137  
138

139  
140  
141  
142  
143  
144  
145  
146  
147  
148  
149  
150  
151  
152  
153  
154  
155  
156  
157  
158  
159  
160  
161  
162  
163  
164  
165  
166  
167  
168  
169  
170  
171  
172  
173  
174  
175  
176  
177  
178  
179  
180  
181  
182  
183  
184

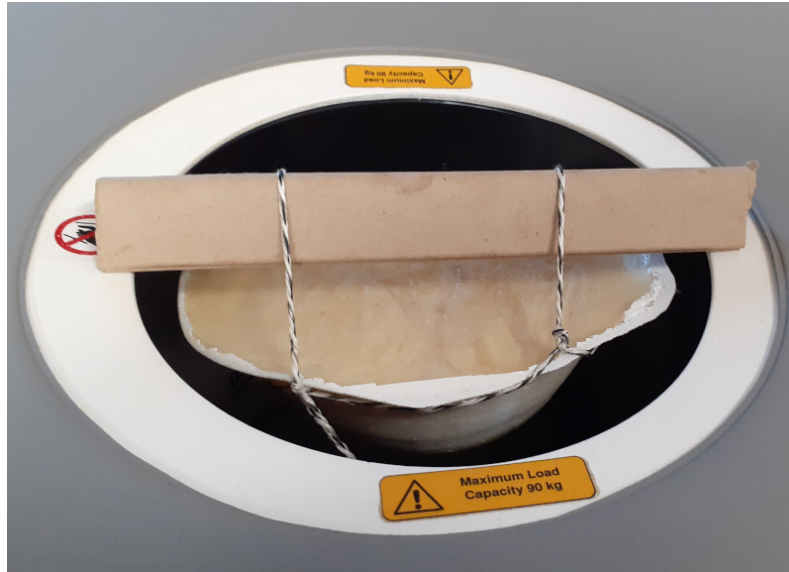

Fig. A4 Filled breast phantom suspended over BCT scanner.
